# Supplementary material for: Characterization of glycan isomers using magnetic carbon nanoparticles as a MALDI co-matrix
Source: Royal Society of Chemistry journal article supplement (doi:10.1039/c9ra02337b), 2019-01-01

Page S-1

Supporting information

## **Characterization of glycan isomers using magnetic carbon nanoparticles as a MALDI co-matrix**

Alireza Banazadeh<sup>1</sup>, Reed Nieman<sup>1</sup>, Mona Goli<sup>1</sup>, Wenjing Peng<sup>1</sup>, Ahmed Hussein<sup>1,2</sup>,  
Ercan Bursal<sup>3</sup>, Hans Lischka<sup>1,4</sup>, Yehia Mechref<sup>1,5</sup>

<sup>1</sup>Department of Chemistry and Biochemistry, Texas Tech University, Lubbock, TX, 79409.

<sup>2</sup>Department of Biotechnology, Institute of Graduate Studies and Research, University of Alexandria, Alexandria, 21526, Egypt.

<sup>3</sup>Department of Nursing, School of Health, Mus Alparslan University, Mus, Turkey.

<sup>4</sup>School of Pharmaceutical Sciences and Technology, Tianjin University, Tianjin, 300072, P.R. China.

<sup>5</sup>Center for Biotechnology and Genomics, Texas Tech University, Lubbock, TX, 79409.

## Table of Contents

**Table 1S.** Structures of standard N-glycans that were used in this study.

**Table 2S.** Calculated relative intensity ratios for the five selected fragment ions originated by each pair of the isomer.

**Table 3S.** Calculated bond dissociation energies for  $\alpha$ 2,3- and  $\alpha$ 2,6-linked sialic acid isomers

**Figure 1S.** MALDI-TOF-MS spectra of (A)  $N_4H_4F_1$ , (B)  $F_1N_4H_4$ , using  $10\mu\text{gDHB}$ . Symbols: ■, N-acetylglucosamine; ●, Galactose; ▼, Fucose; ●, Mannose; ◆, N-acetylneuraminic acid.

**Figure 2S.** MALDI-TOF-MS spectra of (A)  $N_4H_4F_1S_1$ , (B)  $F_1N_4H_4S_1$  using  $10\mu\text{gDHB}+0.1\mu\text{gMCNPs}$ . (C) Comparison of the relative intensities of fragmented ions derived from  $N_4H_4F_1S_1$  and  $F_1N_4H_4S_1$ . † shows the fucosylated fragment ions; ‡ shows the diagnostic ions. Symbols as in Figure 1S.

**Figure 3S.** (A) Extracted ion chromatogram of the glycan  $N_4H_5S_1$ , released from human blood serum. MALDI-TOF-MS spectra of the peak at (B) 46.3 min and (C) 51.8 min. Symbols as in Figure 1S.

**Table 1S.** Structures of standard N-glycans that were used in this study.

| Glycan                                                            | Structure                                                                           |
|-------------------------------------------------------------------|-------------------------------------------------------------------------------------|
| N <sub>4</sub> H <sub>4</sub> F <sub>1</sub>                      | 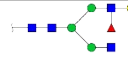  |
| F <sub>1</sub> N <sub>4</sub> H <sub>4</sub>                      |   |
| N <sub>4</sub> H <sub>4</sub> F <sub>1</sub> S <sub>1</sub>       |   |
| F <sub>1</sub> N <sub>4</sub> H <sub>4</sub> S <sub>1</sub>       |   |
| N <sub>4</sub> H <sub>4</sub> F <sub>1</sub> S <sub>1</sub> (2,3) |   |
| N <sub>4</sub> H <sub>4</sub> F <sub>1</sub> S <sub>1</sub> (2,6) |  |

**Note:** Nomenclature of glycans: N: N-acetylhexosamine, H: hexose, F: fucose, and S: sialic acid; numbers denote the number of relative sugars. When F is before N, it is core fucosylation; when F is after N, it is branch fucosylation. 2,3 and 2,6 represent sialic acid linkage.

**Table 2S.** Calculated relative intensity ratios for the five selected fragment ions originated by each pair of the isomer.

| <i>m/z</i>                                                                                                       | Relative intensity ratio | S.D. (n=9) |
|------------------------------------------------------------------------------------------------------------------|--------------------------|------------|
| <b>N<sub>4</sub>H<sub>4</sub>F<sub>1</sub>/F<sub>1</sub>N<sub>4</sub>H<sub>4</sub></b>                           |                          |            |
| 1647.4                                                                                                           | 0.592                    | 0.082      |
| 1546.3                                                                                                           | 1.624                    | 0.134      |
| 1340.3                                                                                                           | 0.379                    | 0.043      |
| 1280.3                                                                                                           | 0.538                    | 0.071      |
| 915.2                                                                                                            | 1.423                    | 0.115      |
| <b>N<sub>4</sub>H<sub>4</sub>F<sub>1</sub>S<sub>1</sub>/F<sub>1</sub>N<sub>4</sub>H<sub>4</sub>S<sub>1</sub></b> |                          |            |
| 1035.2                                                                                                           | 2.135                    | 0.097      |
| 1136.2                                                                                                           | 0.656                    | 0.075      |
| 1178.2                                                                                                           | 0.438                    | 0.036      |
| 1280.2                                                                                                           | 0.523                    | 0.022      |
| 1339.3                                                                                                           | 0.371                    | 0.031      |
| <b>N<sub>4</sub>H<sub>5</sub>S<sub>1</sub>(2,3)/N<sub>4</sub>H<sub>5</sub>S<sub>1</sub>(2,6)</b>                 |                          |            |
| 1136.2                                                                                                           | 1.291                    | 0.045      |
| 1442.2                                                                                                           | 1.545                    | 0.067      |
| 1501.2                                                                                                           | 1.800                    | 0.105      |
| 1663.3                                                                                                           | 0.546                    | 0.018      |
| 1976.3                                                                                                           | 0.320                    | 0.037      |

**Table 3S.** Calculated bond dissociation energies for  $\alpha$ 2,3- and  $\alpha$ 2,6-linked sialic acid isomers

| Bond dissociation energy ( $\Delta E$ , kcal/mol) | $\alpha$ 2,3-linkage sialic acid | $\alpha$ 2,6-linkage sialic acid |
|---------------------------------------------------|----------------------------------|----------------------------------|
| $\Delta E(1)$                                     | 129.43                           | 138.91                           |
| $\Delta E(2)$                                     | 109.00                           | 119.82                           |

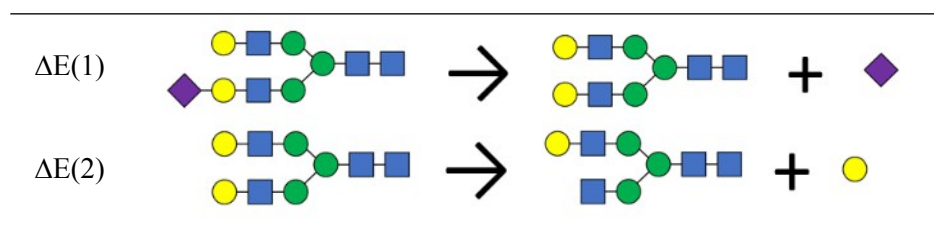

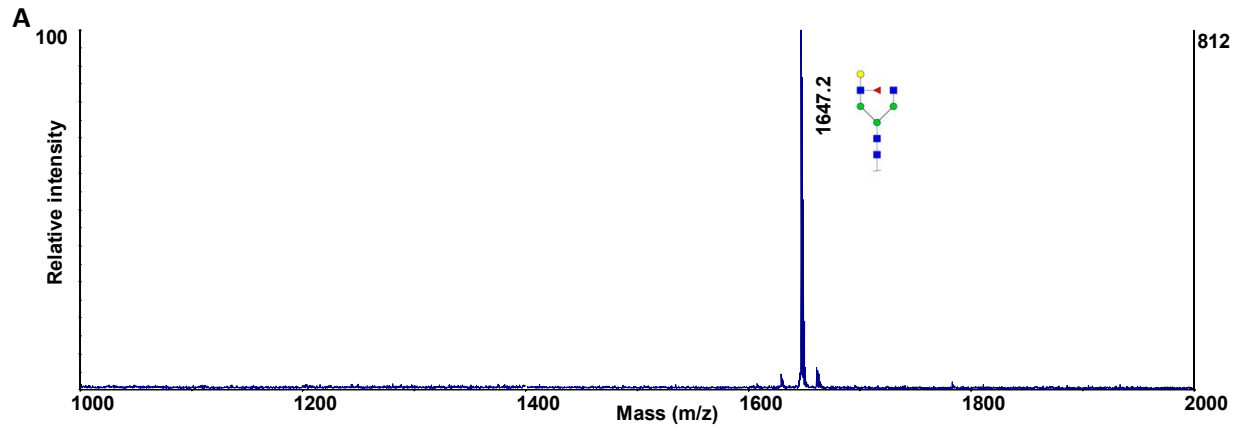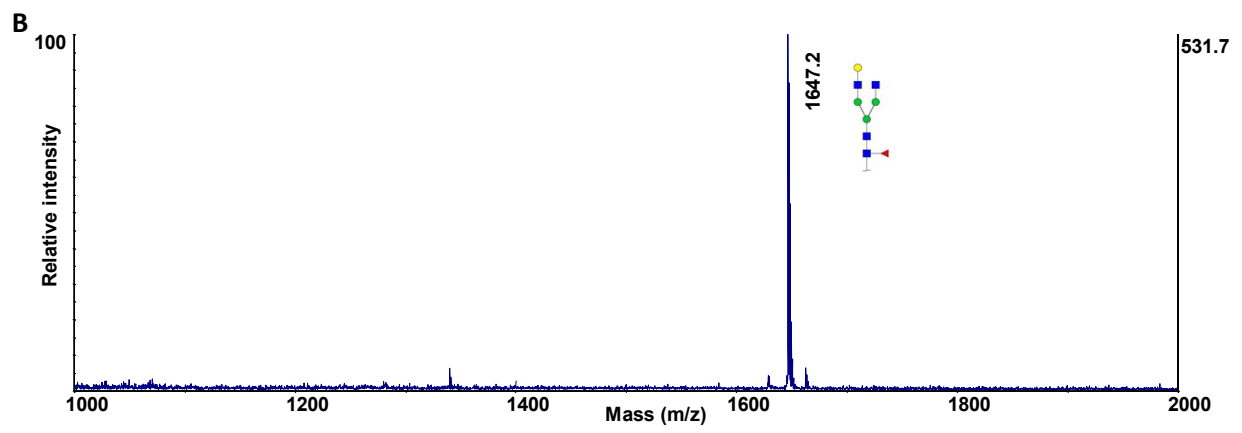

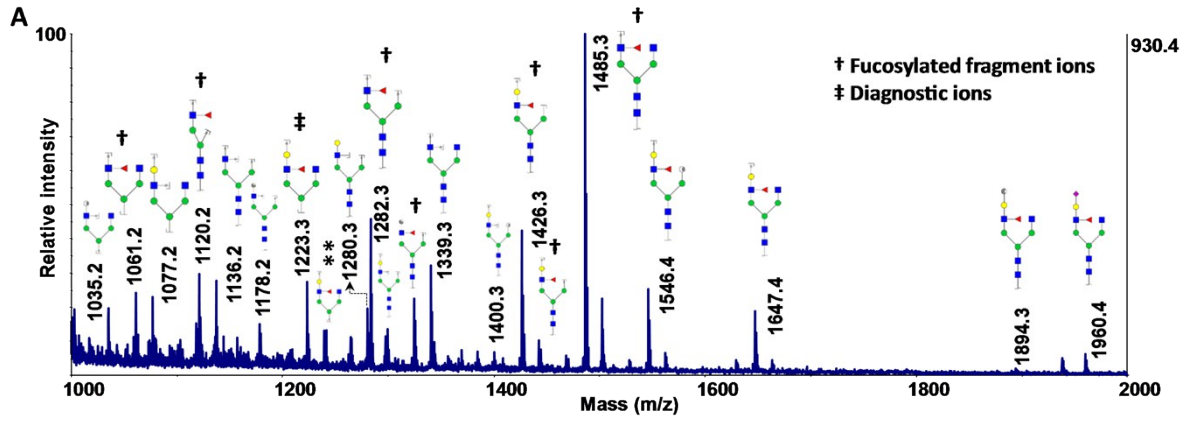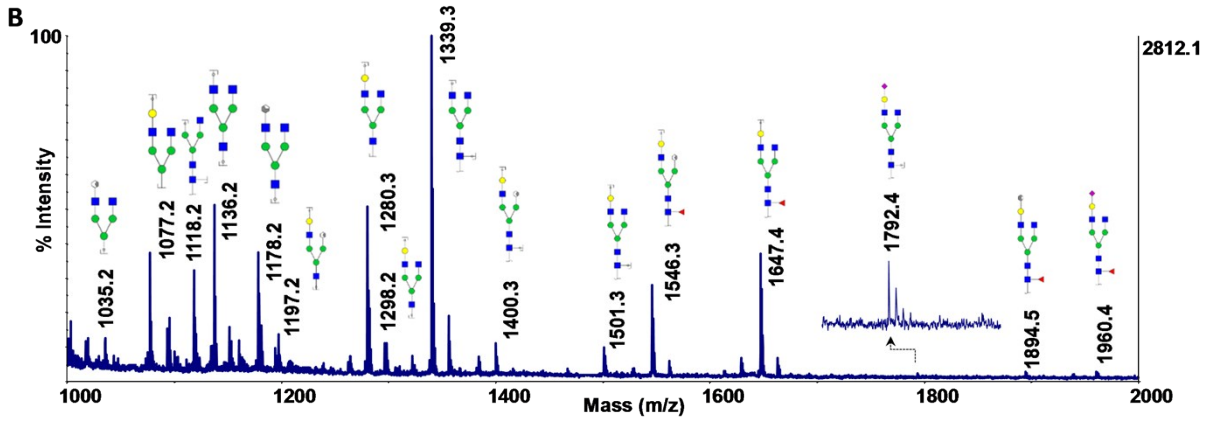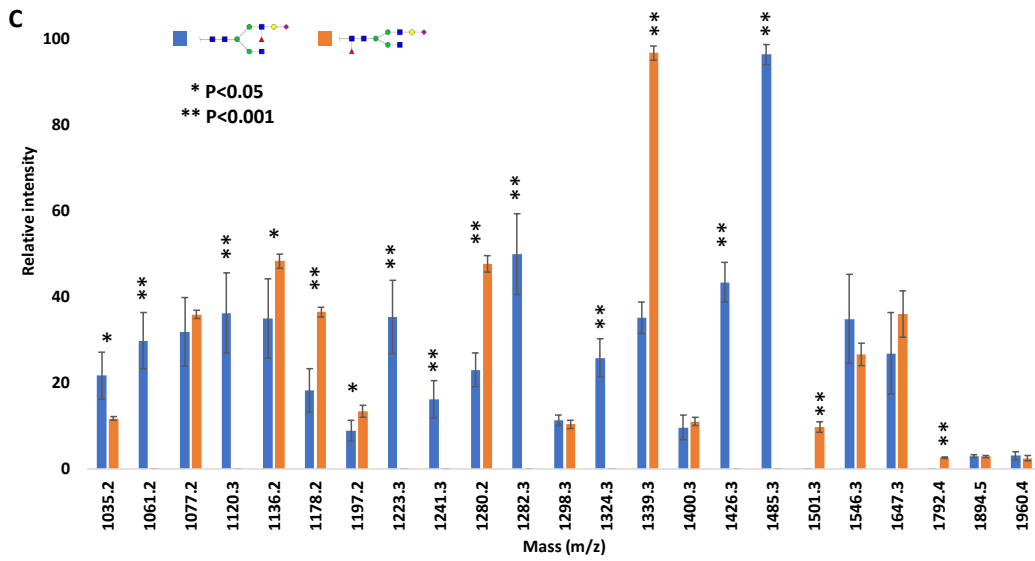

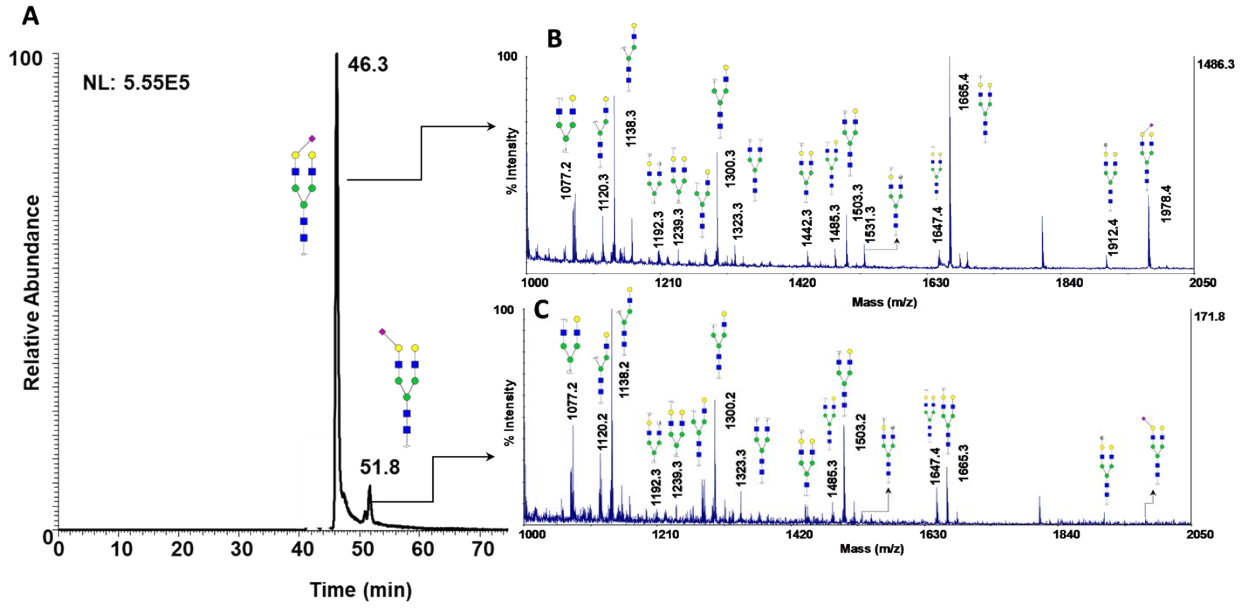

Supplement: c9ra02337b1.pdf [file c9ra02337b1.pdf]
